# Supplementary material for: Ionic liquid modified poly(vinylidene fluoride): crystalline structures, miscibility, and physical properties
Source: Royal Society of Chemistry journal article supplement (doi:10.1039/c3py00466j), 2013-01-01
Supplement: c3py00466j.pdf [file c3py00466j.pdf]

## Supporting Information

### **Ionic Liquid Modified Poly(vinylidene fluoride): Miscibility, Crystalline Structure, and Physical Properties**

Chenyang Xing, Mengmeng Zhao, Liping Zhao\*, Jichun You,  
Xiaojun Cao, Yongjin Li\*

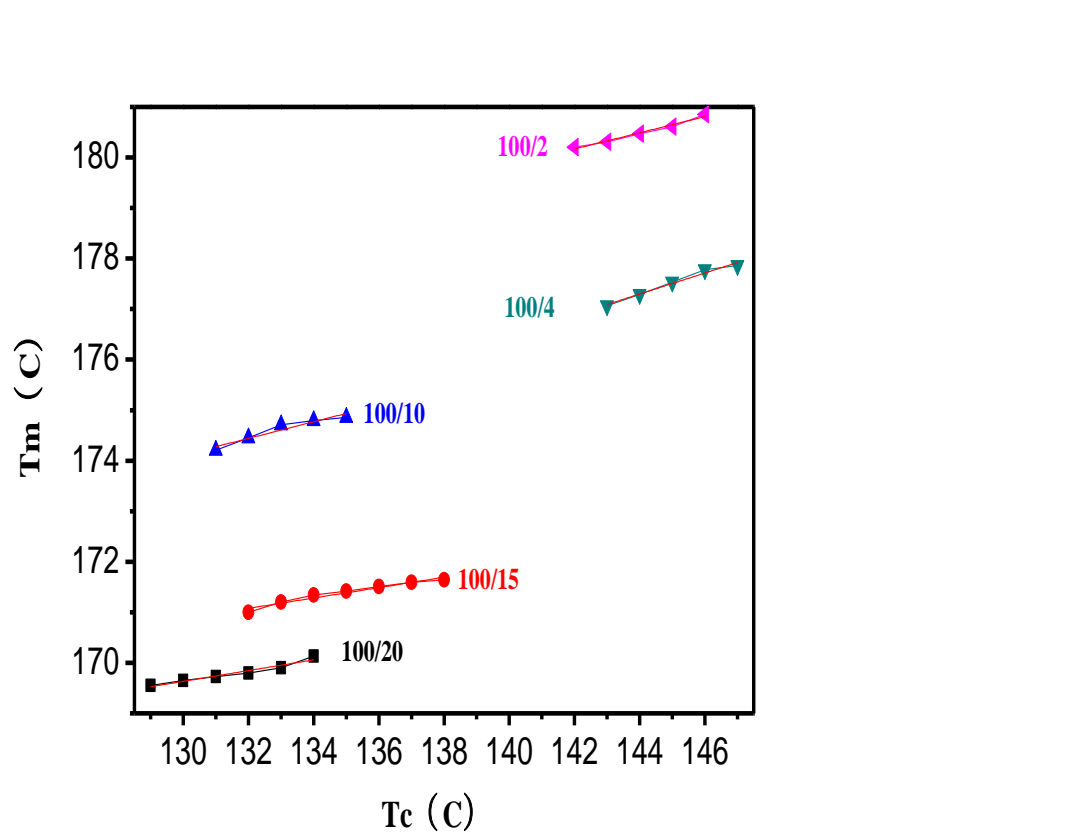

**Figure S1.** Hoffman-Weeks plots for PVDF/IL blends.

**Table S1.** is the corresponding detailed fitting information.

| Sample Logo | Slope  | Intercept | $T_m^0 / ^\circ\text{C}$ |
|-------------|--------|-----------|--------------------------|
| 100/2       | 0.16   | 157.448   | 187.4                    |
| 100/4       | 0.208  | 147.3456  | 186.0                    |
| 100/10      | 0.1644 | 152.7408  | 182.3                    |
| 100/15      | 0.1025 | 157.5482  | 180.1                    |
| 100/20      | 0.1475 | 150.4285  | 176.5                    |

**Table S1.** The calculated equilibrium melting temperature ( $T_m^0$ ) of each

PVDF/IL blend, obtained from the equation:

$$T_m^0 - T_m = A (T_m^0 - T_C)$$

where, the A is the stability parameter of crystals.
